# Supplementary material
Source: Springer Nature journal article supplement (https://www.springermedizin.de/resource/supplementary/12931_2013_1586_MOESM5_ESM.pdf/9426264)
Supplement: MOESM5 [file 9426264]

**5,114 Participants  
(baseline population)**

**(Tocopherol data?)**

**YES**

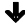

**4,827**

**NO**

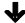

**287**

**(Lung function data?)**

**YES**

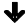

**4,584**

**NO**

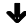

**243**

**(BMI, height, smoking data?)**

**YES**

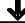

**4,538**

**NO**

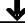

**46**

**(COPD?)**

**NO**

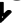

**4,526**

**YES**

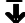

**12**
